# Supplementary material for: Electric field-induced ball-cactus-like CuCo2Sx(OH)y nano-heterostructure towards high-performance supercapacitors
Source: Royal Society of Chemistry journal article supplement (doi:10.1039/d3qi01277h), 2023-01-01
Supplement: d3qi01277h1.pdf [file d3qi01277h1.pdf]

## Supporting Information

### Electric field-induced ball-cactus like $\text{CuCo}_2\text{S}_x(\text{OH})_y$ nano-heterostructure towards high-performance supercapacitors

Faxue Lu<sup>a</sup>, Yajun Ji<sup>\*a</sup>, Dong Shi<sup>a</sup>, Junnan Yao<sup>a</sup>, Pengcheng Zhang<sup>a</sup>, Shixiong Zhang<sup>a</sup>

<sup>a</sup> School of Materials and Chemistry, University of Shanghai for Science and Technology, Jungong Road 334#, 200093 Shanghai, China.

\*Corresponding author: E-mail: [jiyajun@usst.edu.cn](mailto:jiyajun@usst.edu.cn) Fax: +86 21 65667144; Tel: +86 21 65667144

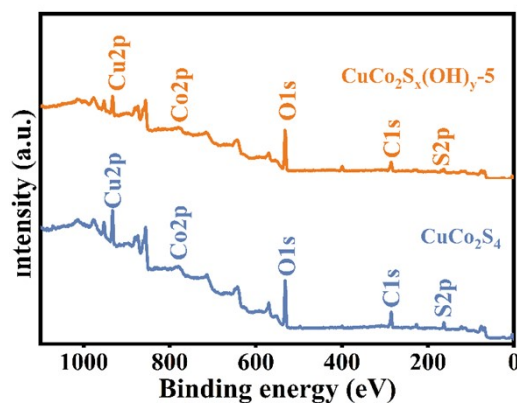

Fig. S1 XPS survey spectrum of the as-synthesized  $\text{CuCo}_2\text{S}_4$  and  $\text{CuCo}_2\text{S}_x(\text{OH})_{y-5}$

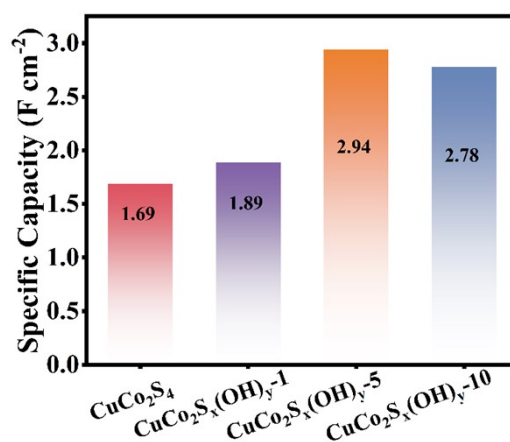

Fig. S2 The comparison of specific capacitance of different electrode materials at the current density of  $5 \text{ mA cm}^{-2}$ .

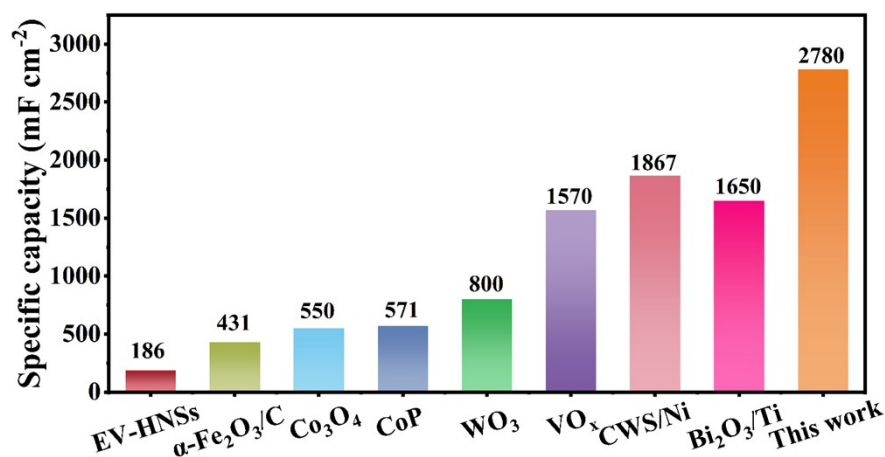

Fig. S3 Comparison of area specific capacitance (mF cm<sup>-2</sup>) with other reported negative electrode materials.

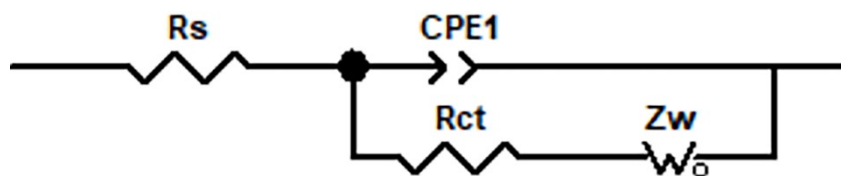

Fig. S4 The equivalent circuit model fitting Nyquist diagram.

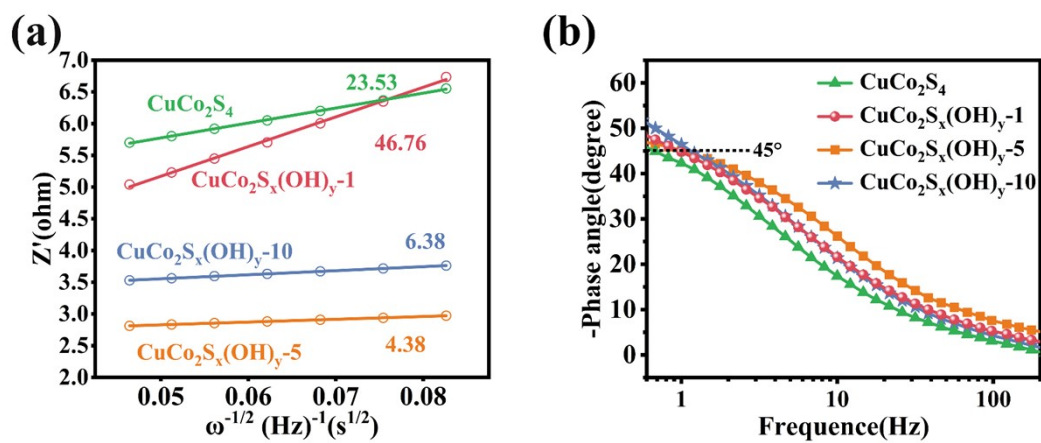

Fig. S5 (a) The linear relation between real part ( $Z'$ ) and the square root of frequency ( $\omega^{-1/2}$ ) at low frequency region; (b) The bode plots of phase angle versus frequency.

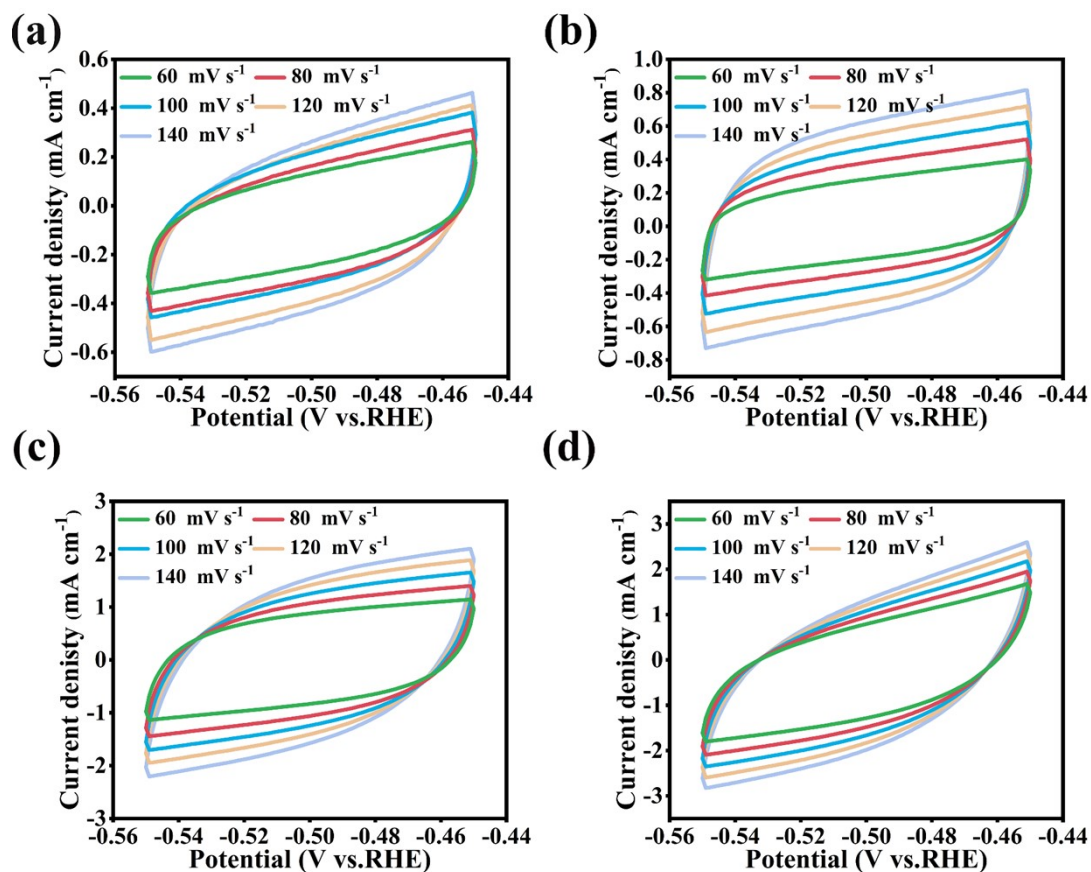

**Fig. S6** CV curves of (a)  $\text{CuCo}_2\text{S}_4$ , (b)  $\text{CuCo}_2\text{S}_x\text{OH}_y-1$ , (c)  $\text{CuCo}_2\text{S}_x\text{OH}_y-5$  and (d)  $\text{CuCo}_2\text{S}_x\text{OH}_y-10$  at different scan rates (from 60 to  $140 \text{ mV s}^{-1}$ ) with the potential range of  $-0.55 \text{ V}$  to  $-0.45 \text{ V}$ .

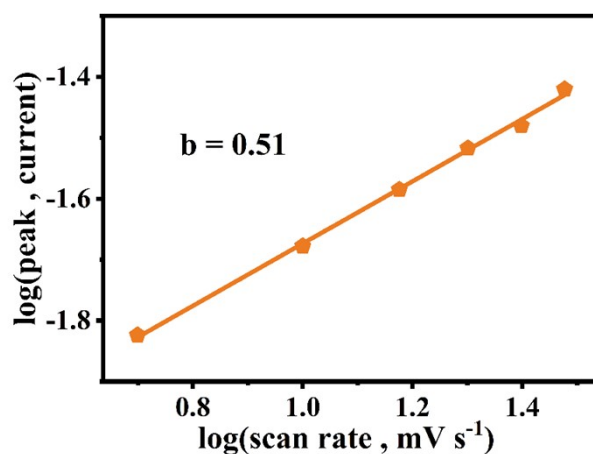

**Fig. S7** Plot of the anodic peak current density against the scan rate for  $\text{CuCo}_2\text{S}_x\text{OH}_y-5$  electrode.

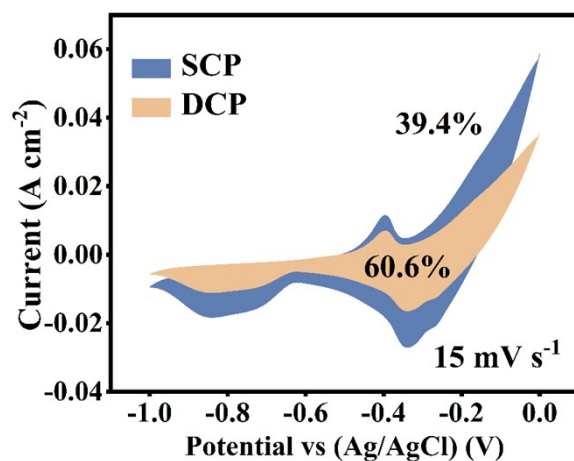

Fig. S8 The surface contribution and diffusive contribution of the  $\text{CuCo}_2\text{S}_x\text{OH}_y\text{-5}$  electrode at the scan rate of  $15 \text{ mV s}^{-1}$ .

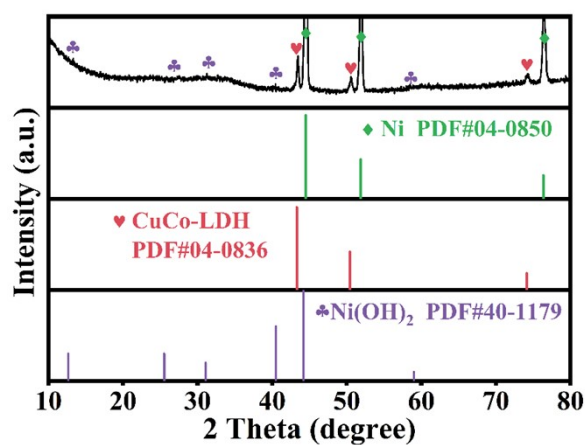

Fig. S9 XRD patterns of the as-synthesized  $\text{CuCo-LDH@Ni(OH)}_2$ .

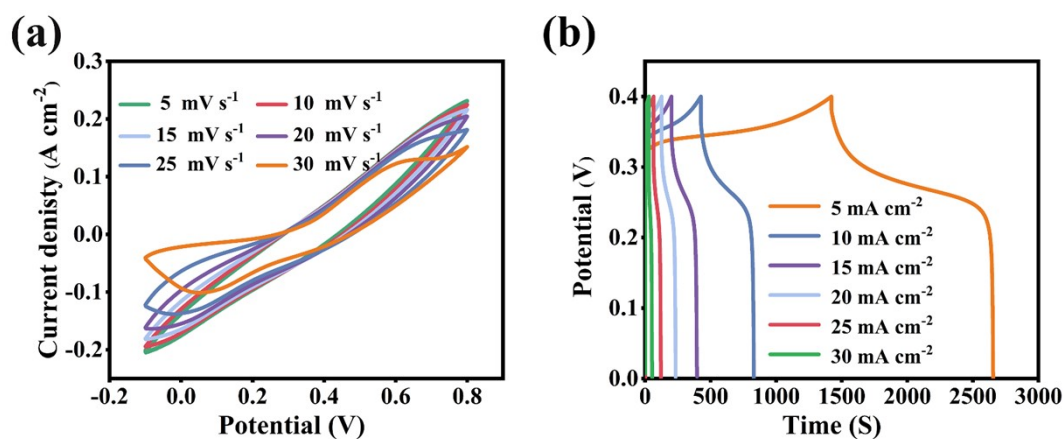

Fig. S10 (a) CV curves of  $\text{CuCo-LDH@Ni(OH)}_2$  electrode at different scan rates from  $5 \text{ mV s}^{-1}$  to  $30 \text{ mV s}^{-1}$  and (b) the corresponding

GCD curves at different current densities from 5 mA cm<sup>-2</sup> to 30 mA cm<sup>-2</sup>.

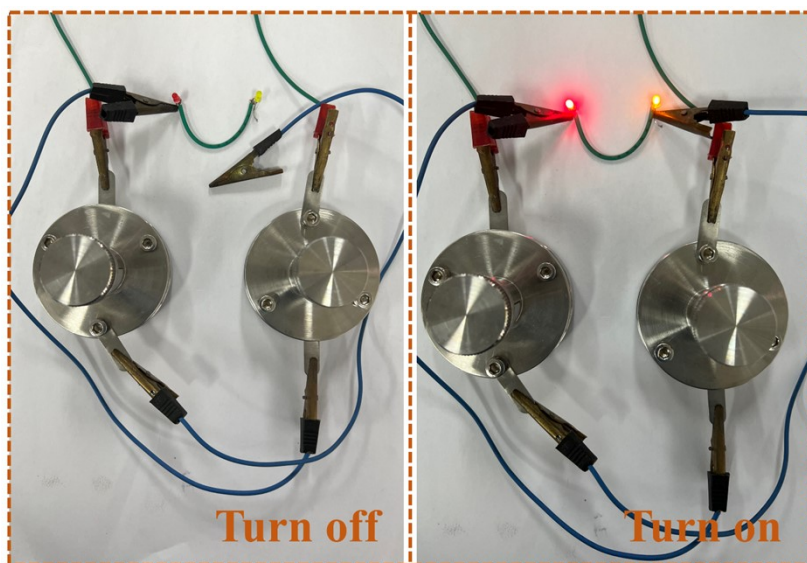

**Fig. S11** Two LED lights powered by two series connected HSC devices.

**Table S1** Comparison of the internal resistance ( $R_s$ ) value and charge-transfer resistance ( $R_{ct}$ ) value of  $\text{CuCo}_2\text{S}_4$  and  $\text{CuCo}_2\text{S}_x\text{OH}_y$ -1,  $\text{CuCo}_2\text{S}_x\text{OH}_y$ -5 and  $\text{CuCo}_2\text{S}_x\text{OH}_y$ -10.

| Sample                                   | $R_s$ ( $\Omega$ ) | $R_{ct}$ ( $\Omega$ ) |
|------------------------------------------|--------------------|-----------------------|
| $\text{CuCo}_2\text{S}_4$                | 3.5                | 2.8                   |
| $\text{CuCo}_2\text{S}_x\text{OH}_y$ -1  | 3.2                | 2.1                   |
| $\text{CuCo}_2\text{S}_x\text{OH}_y$ -5  | 2.2                | 1.0                   |
| $\text{CuCo}_2\text{S}_x\text{OH}_y$ -10 | 2.7                | 2.1                   |
